# Supplementary material for: Non-purged voltammetry explored with AGNES
Source: Royal Society of Chemistry journal article supplement (doi:10.1039/c3cp52836g), 2013-01-01
Supplement: c3cp52836g.pdf [file c3cp52836g.pdf]

1 **Non-purged voltammetry explored with AGNES**

2 D. Aguilar<sup>a</sup>, J. Galceran<sup>a\*</sup>, E. Companys<sup>a</sup>, J. Puy<sup>a</sup>, C. Parat<sup>b</sup>, L. Authier<sup>b</sup>, M. Potin-Gautier<sup>b</sup>

3 <sup>a</sup>Departament de Química. Universitat de Lleida and AGROTECNIO, Rovira Roure 191, 25198 Lleida,  
4 Catalonia, Spain

5 <sup>b</sup>Université de Pau et des Pays de l'Adour, L.C.A.B.I.E, UMR 5254, IPREM, Avenue Pierre Angot, 64053  
6 Pau Cedex 9, France

7 \*corresponding author galceran@quimica.udl.cat

8

9

10 **Supporting Information**

11

12

13 Table SI-1. Computed experimental and theoretical pH<sup>S</sup> and estimated *g* factors and metal surface concentrations for  
 14 various Zn<sup>2+</sup> and Cd<sup>2+</sup> solutions in presence of different ligands and buffers. 10% of uncertainty has been considered  
 15 in all the performed measurements in order to compute the pH range.  
 16 <sup>a</sup> Visual MINTEQ predicts formation of insoluble metal hydroxides

| M <sup>2+</sup> | c <sub>T,M</sub> / μM | c <sub>T,buffer</sub> / M | c <sub>T,ligand</sub> / μM | pH* | <i>g</i> | [M <sup>2+</sup> ] <sup>S</sup> / nM | AGNES pH <sup>S</sup>     | Model pH <sup>S</sup> |
|-----------------|-----------------------|---------------------------|----------------------------|-----|----------|--------------------------------------|---------------------------|-----------------------|
| Zn              | 1.5                   | No buffer                 | No ligand                  | 2.1 | 1.15     | 1300                                 | 2.1 to 8.2                | 2.1                   |
| Zn              | 1.5                   | No buffer                 | No ligand                  | 4.9 | 2710     | 0.551                                | 10.2 to 10.3              | 10.4                  |
| Zn              | 1.5                   | [MES]=0.01                | [NTA]=1.5                  | 5.0 | 2.16     | 322                                  | 5.8 to 6.0                | 5.9                   |
| Zn              | 1.5                   | [MES]=0.01                | [NTA]=1.5                  | 5.5 | 1.89     | 237                                  | 6.0 to 6.2                | 6.2                   |
| Zn              | 1.5                   | [MES]=0.01                | [NTA]=1.5                  | 6.0 | 3.74     | 75.2                                 | 7.1 to 7.3                | 6.7                   |
| Zn              | 1.5                   | [MES]=0.01                | [NTA]=1.5                  | 6.4 | 4.53     | 37.1                                 | 7.4 to 7.6                | 7.9                   |
| Zn              | 1.0                   | [MOPS]=0.01               | [glycine]=200              | 7.6 | 7.18     | 112                                  | 8.7 to 8.9                | 8.8                   |
| Cd              | 1.5                   | No buffer                 | No ligand                  | 2.2 | 1.07     | 1350                                 | 2.2 to 9.3                | 2.2                   |
| Cd              | 1.5                   | No buffer                 | No ligand                  | 4.1 | 4.15     | 347                                  | 10.0 to 10.2 <sup>a</sup> | 9.8                   |
| Cd              | 1.5                   | No buffer                 | No ligand                  | 5.1 | 6.90     | 207                                  | 10.2 to 10.3 <sup>a</sup> | 10.3 <sup>a</sup>     |
| Cd              | 1.0                   | No buffer                 | No ligand                  | 6.6 | 15.1     | 69.0                                 | 10.4 to 10.6 <sup>a</sup> | 10.3 <sup>a</sup>     |
| Cd              | 2.5                   | [MES]=0.01                | [NTA]=1.5                  | 5.0 | 1.50     | 1310                                 | 5.7 to 6.2                | 5.8                   |
| Cd              | 2.5                   | [MES]=0.01                | [NTA]=1.5                  | 6.0 | 1.24     | 1080                                 | 6.3 to 8.4                | 6.4                   |
| Cd              | 2.5                   | [MES]=0.01                | [NTA]=1.5                  | 6.6 | 1.23     | 900                                  | 7.7 to 9.5                | 7.8                   |

17 Table SI-2. Experimental  $g$  factors in different calibrations and speciation experiments performed  
18 with AGNES under non-purged conditions.  
19

| $M^{2+}$ | Experiment  | $c_{T,M}/\mu\text{M}$ | $c_{T,\text{buffer}}/\text{M}$ | $c_{T,\text{ligand}}/\mu\text{M}$ | pH* | $g$  |
|----------|-------------|-----------------------|--------------------------------|-----------------------------------|-----|------|
| Cd       | Calibration | From 0 to 0.3         | No buffer                      | No ligand                         | 6.0 | 20.0 |
| Cd       | Speciation  | 0.3                   | No buffer                      | [NTA]=0.13                        | 6.0 | 25.7 |
| Cd       | Speciation  | 0.3                   | No buffer                      | [NTA]=0.20                        | 6.0 | 35.0 |
| Cd       | Calibration | From 0 to 1.0         | [MES]=0.01                     | No ligand                         | 6.7 | 1.30 |
| Cd       | Speciation  | 1.0                   | [MES]=0.01                     | [NTA]=0.19                        | 6.7 | 1.32 |
| Cd       | Speciation  | 1.0                   | [MES]=0.01                     | [NTA]=0.43                        | 6.7 | 1.39 |
| Cd       | Speciation  | 1.0                   | [MES]=0.01                     | [NTA]=0.62                        | 6.7 | 1.40 |
| Zn       | Calibration | From 0 to 1.0         | [MOPS]=0.01                    | No ligand                         | 7.6 | 5.97 |
| Zn       | Speciation  | 1.0                   | [MOPS]=0.01                    | [glycine]=200                     | 7.6 | 7.18 |
| Zn       | Speciation  | 1.0                   | [MOPS]=0.01                    | [glycine]=500                     | 7.6 | 7.39 |
| Zn       | Speciation  | 1.0                   | [MOPS]=0.01                    | [glycine]=750                     | 7.6 | 7.73 |

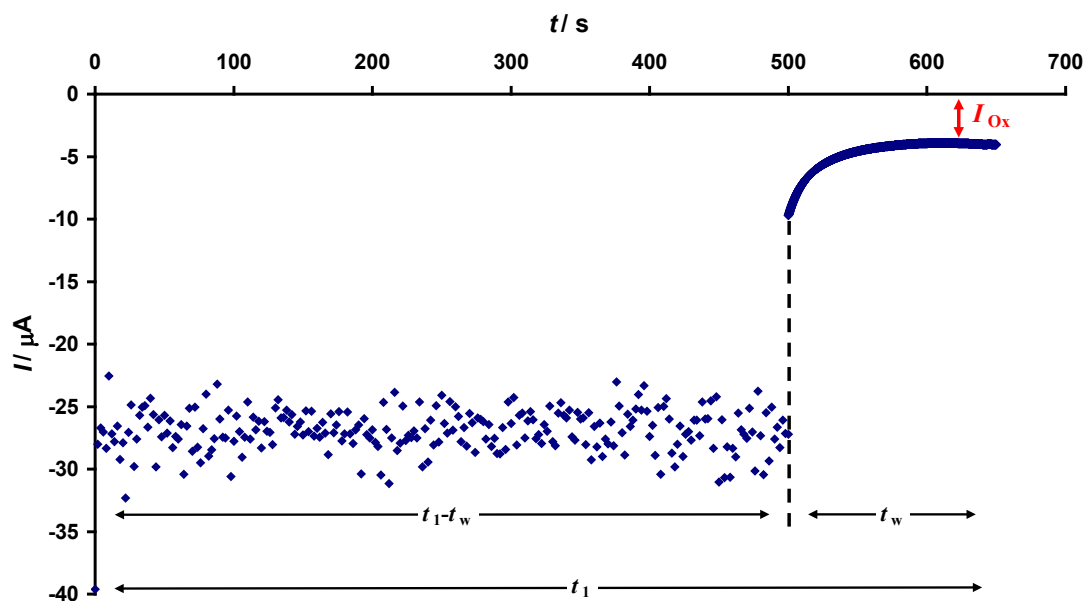

21

22 Figure SI-1 Currents measured during the deposition stage: with stirring ( $t_1 - t_w$ ) and without  
23 stirring or waiting stage ( $t_w$ ) in an AGNES experiment for a  $1 \mu\text{M}$  Zn solution, showing how the  
24 oxidants current  $I_{\text{Ox}}$  can be obtained at the end of the  $t_w$  step.

25

26

27

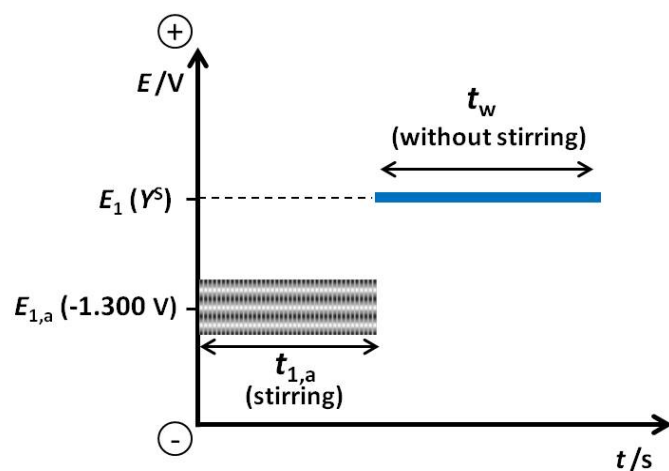

28

29 Figure SI-2: Outline of the potential and stirring 2-Pulse program applied in the strategy of splitting  
30 the deposition stage into two potential steps with SPE in non-purged solutions.  $E_{1,a}$  (applied for a  
31 time  $t_{1,a}$ ) is a deposition potential under diffusion limited conditions for accumulation.  $E_1$  (during  
32  $t_w$  without stirring) is the deposition potential controlling the gain  $Y^S$ .  
33

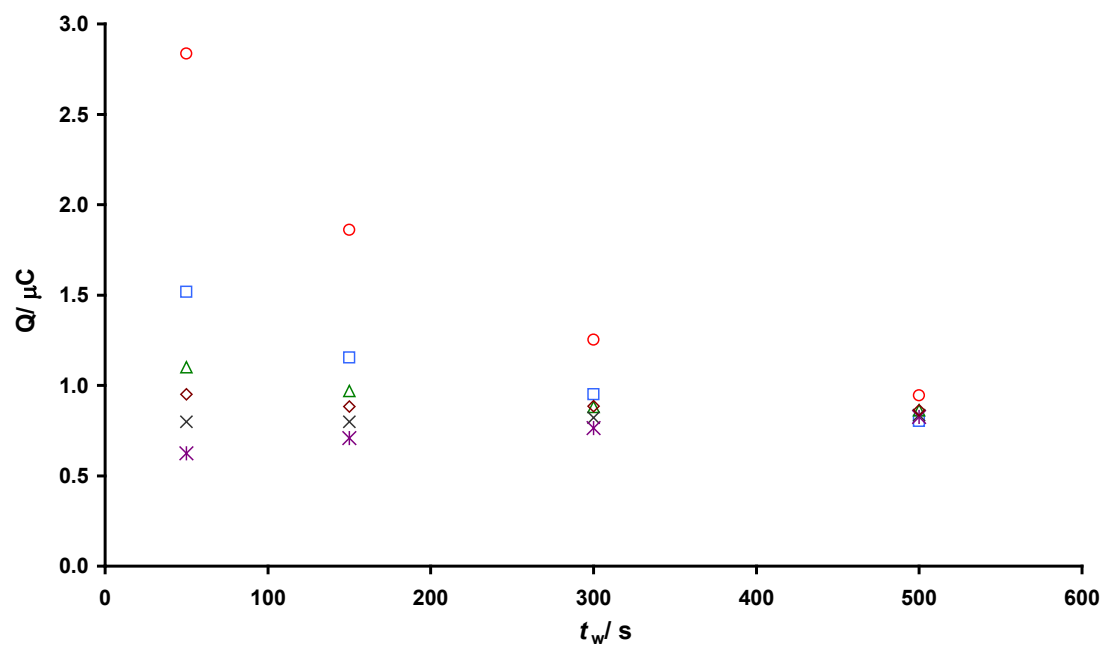

34

35 Figure SI-3: Search of the optimal deposition time under diffusion limited conditions ( $t_{1,a}$ ) in a 2-  
36 Pulses AGNES procedure without purging in a sample with  $c_{\text{T,Zn}}=0.75 \mu\text{M}$  at  $\text{pH}^*=4.35$ . AGNES  
37 conditions were  $E_{1,a}=-1.300 \text{ V}$ ,  $t_{1,a} = 10 \text{ s}$  (\*),  $20 \text{ s}$  (x),  $25 \text{ s}$  (◊),  $30 \text{ s}$  (Δ),  $60 \text{ s}$  (□) and  $120 \text{ s}$  (○),  $E_1 = -$   
38  $1.180 \text{ V}$  and  $t_w$  between 50 and 500 s. An optimal  $t_{1,a}=25 \text{ s}$  has been found.  
39

40

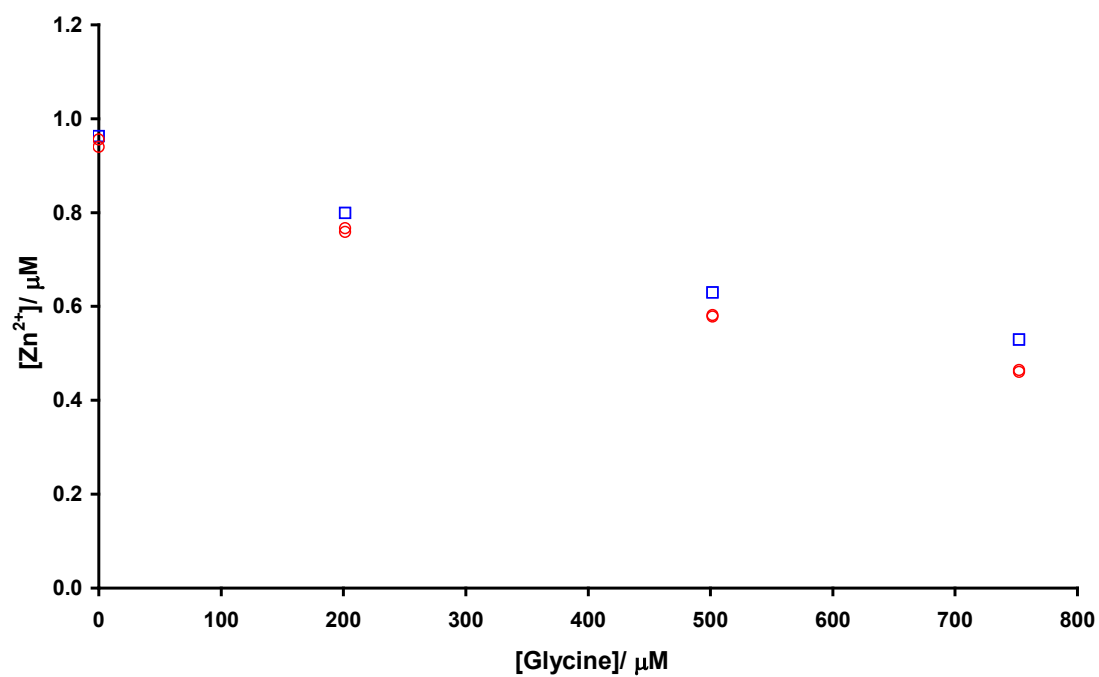

41

42 Figure SI-4: Free Zn<sup>2+</sup> concentration in a titration of a solution  $c_{T,Zn}=1.0 \mu\text{M}$  with increasing  
43 amounts of glycine without purging. [MOPS] = 0.01 M; pH\* = 7.6. Parameters  $E_1=-1.110 \text{ V}$  and  
44  $t_1=650-1150 \text{ s}$  and  $t_w=150 \text{ s}$ . Blue squares indicate the value predicted by Visual Minteq and red  
45 circles stand for AGNES results.

46

47

48
